# Supplementary material for: Sam50 exerts neuroprotection by maintaining the mitochondrial structure during experimental cerebral ischemia/reperfusion injury in rats
Source: PubMed Central journal article supplement (PMC9627377; doi:10.1111/cns.13967), 2022-09-08

# Full unedited gel/blot for Figure 1F

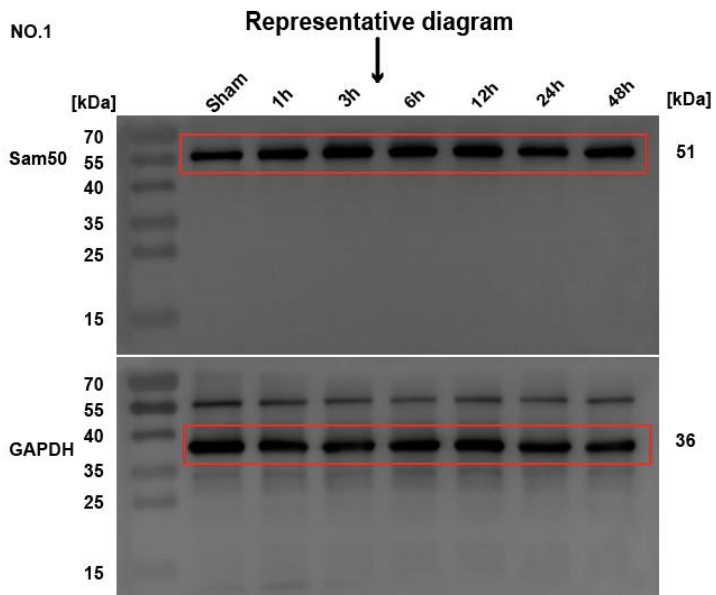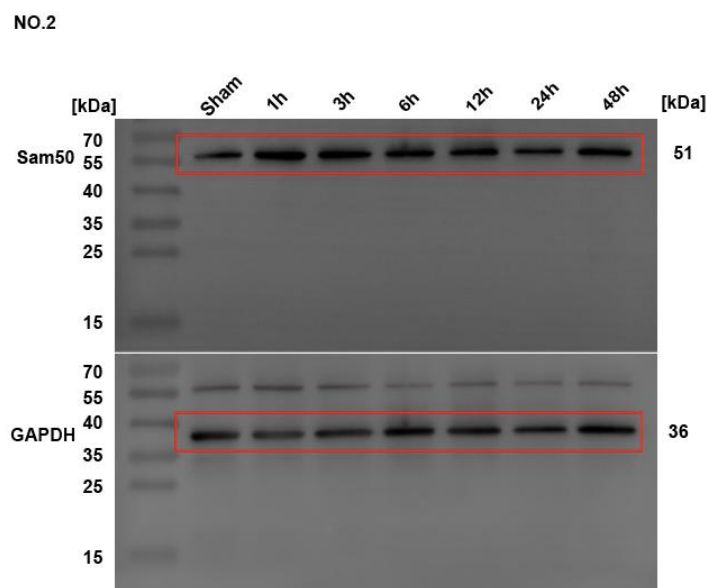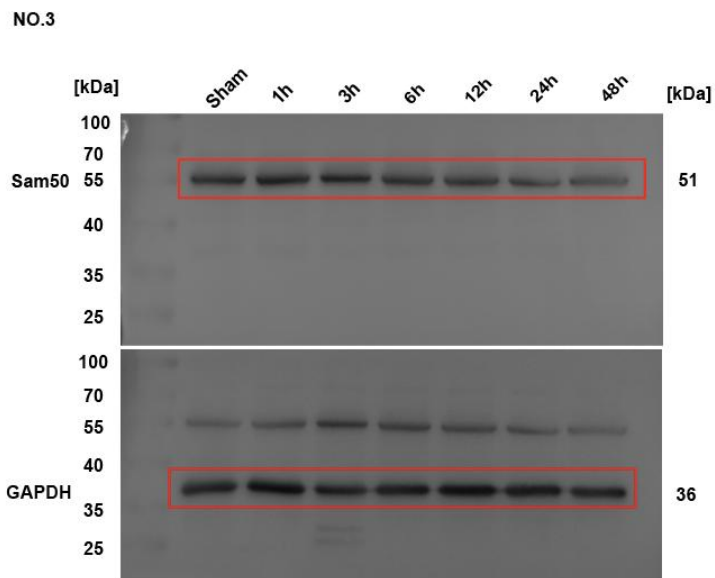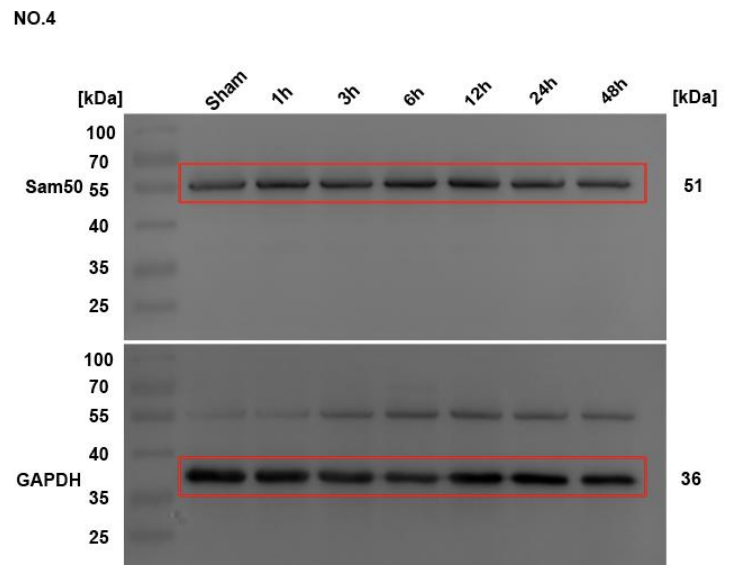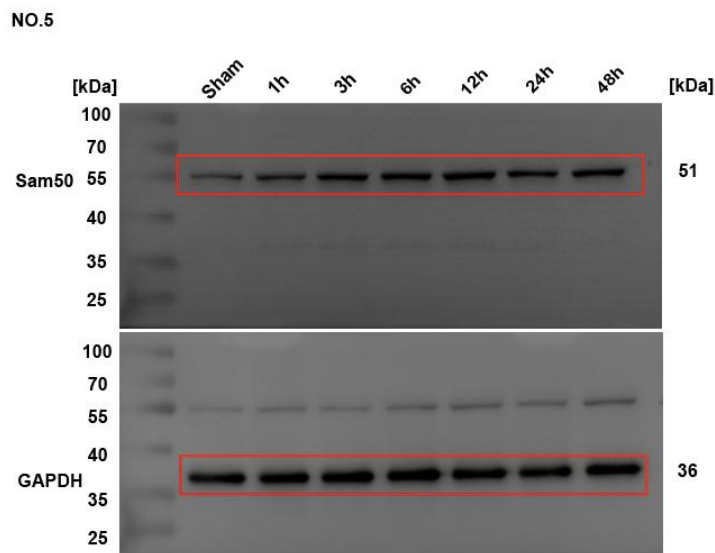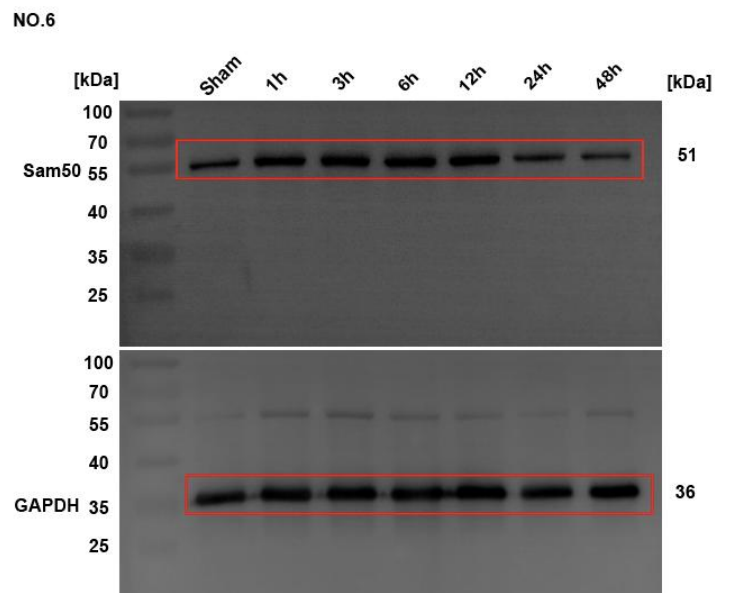

# Full unedited gel/blot for Figure 2B

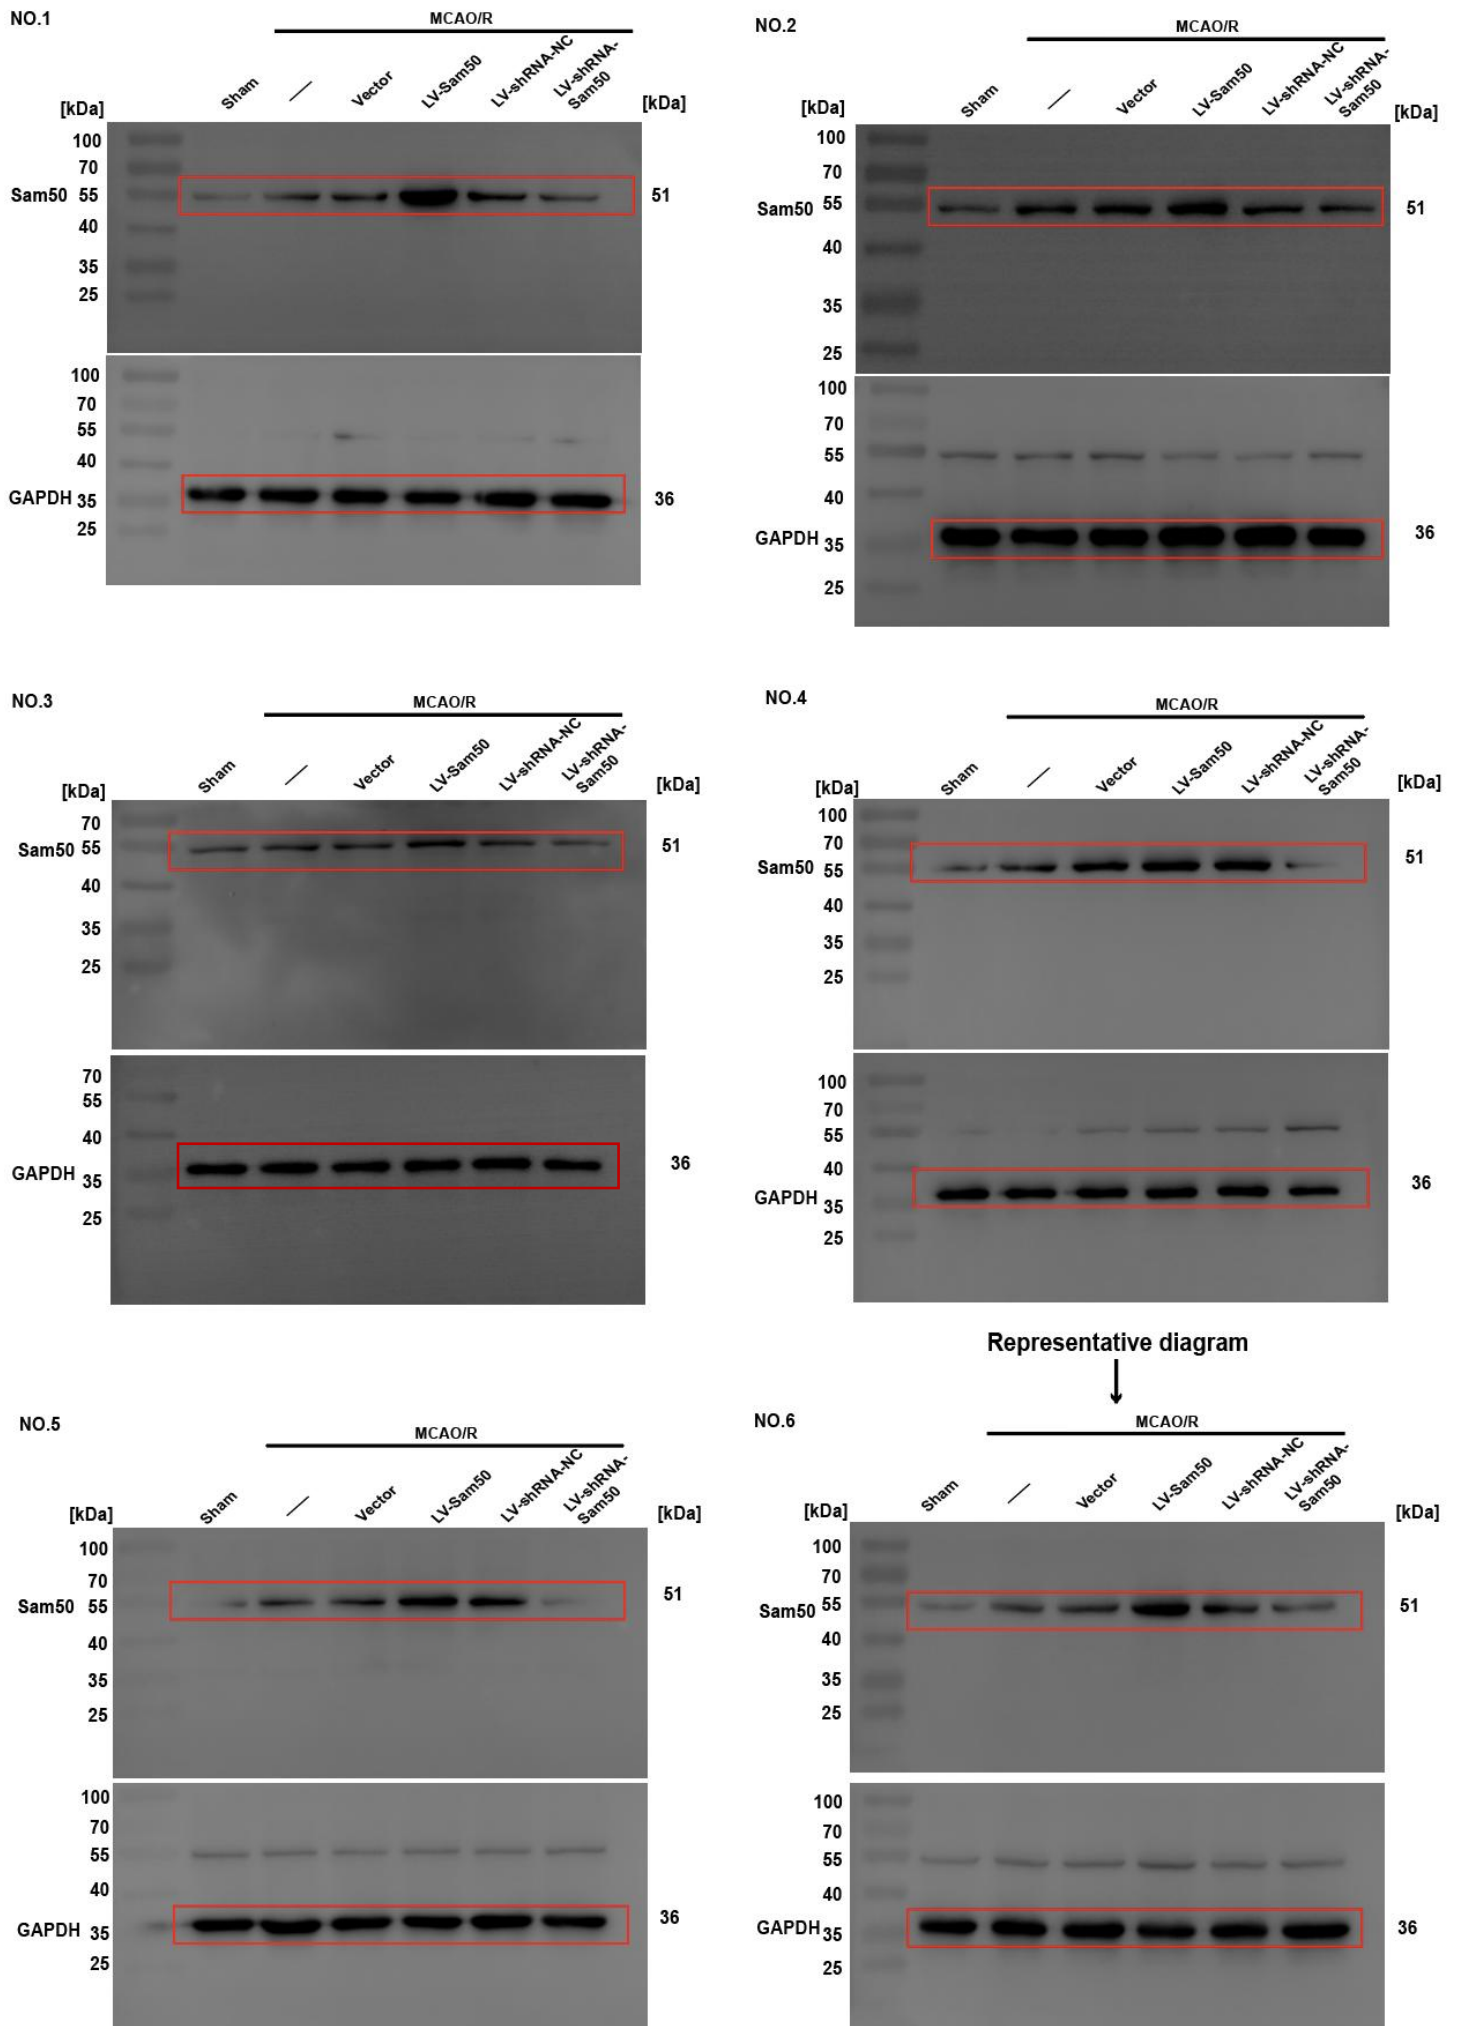

# Full unedited gel/blot for Figure 5B

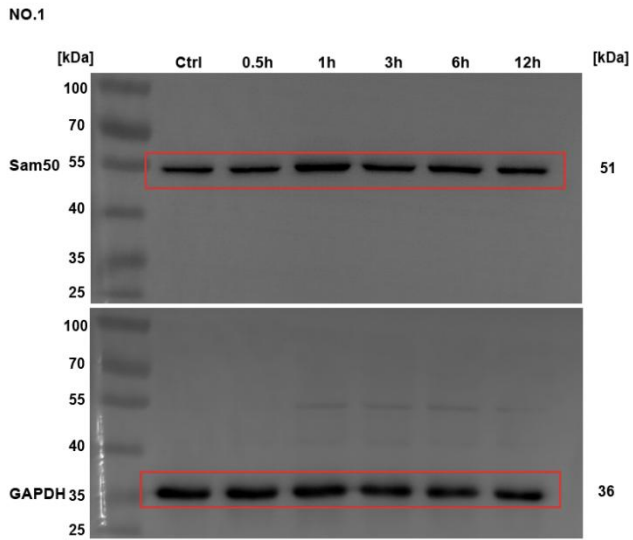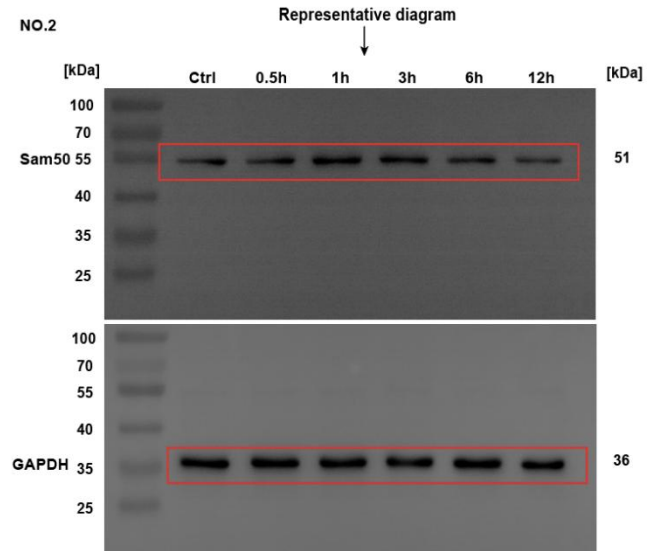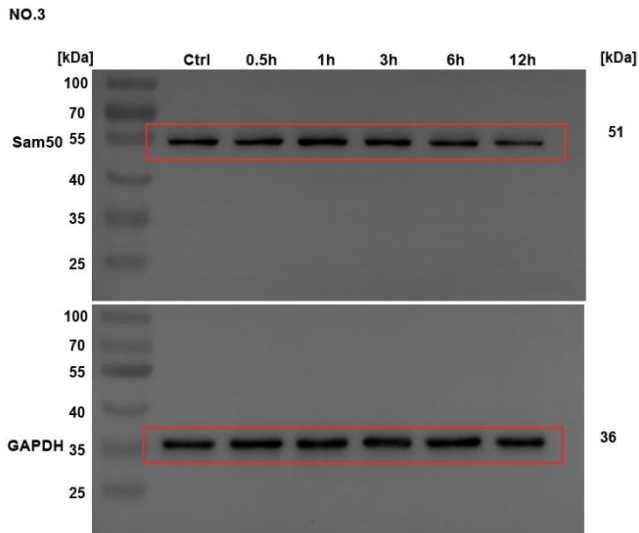

# Full unedited gel/blot for Figure 5D

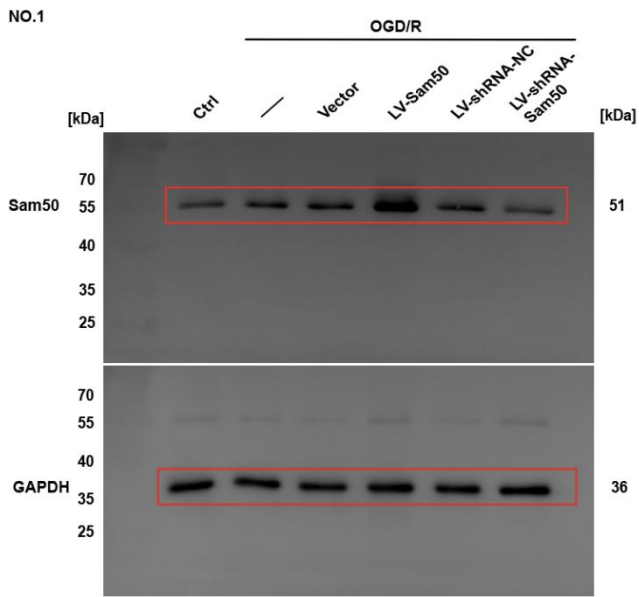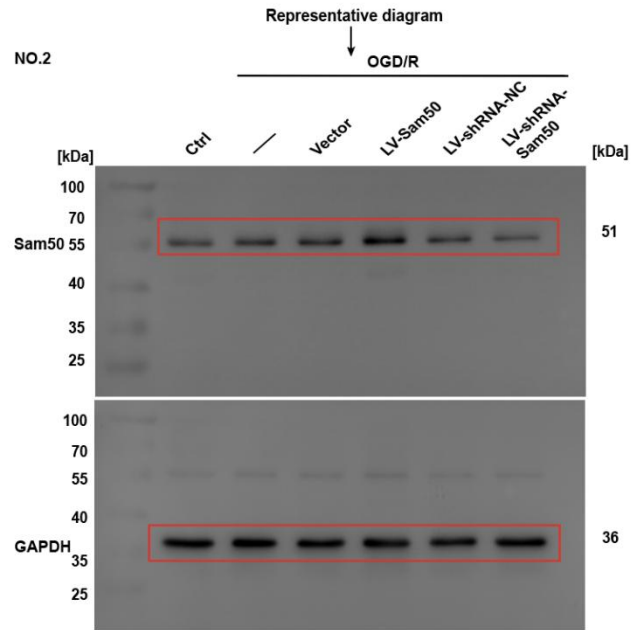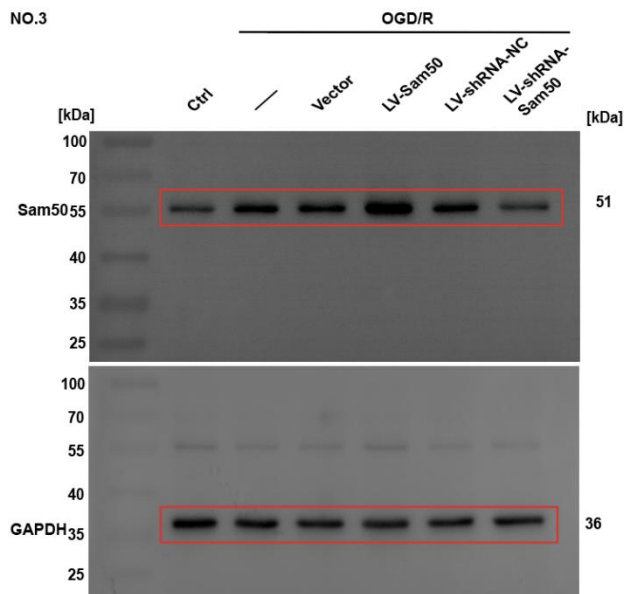

# Full unedited gel/blot for Figure 6F

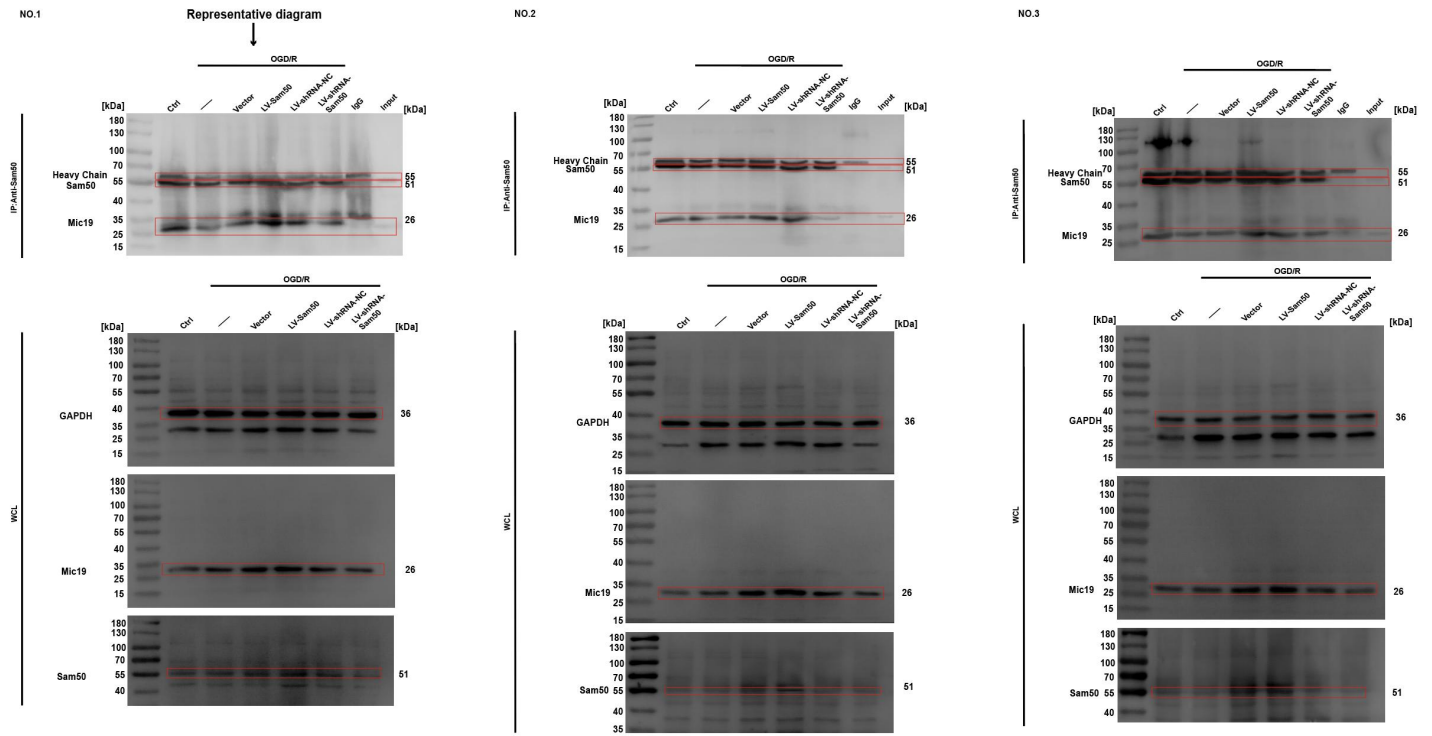

Supplement: CNS-28-2230-s001.pdf [file CNS-28-2230-s001.pdf]
